# Supplementary material for: 4-Aminocyclopentane-1,3-diols as platforms for diversity: synthesis of a screening library
Source: Royal Society of Chemistry journal article supplement (doi:10.1039/c3md00252g), 2013-12-02
Supplement: c3md00252g.pdf [file c3md00252g.pdf]

## **4-Aminocyclopentane-1,3-diols as Platforms for Diversity: Synthesis of a Screening Library**

V. Zohrabi-Kalantari,<sup>a</sup> F. Wilde,<sup>a</sup> R. Grünert,<sup>a</sup> P. J. Bednarski<sup>a</sup> and A. Link<sup>a</sup>

<sup>a</sup> *Institute of Pharmacy, Ernst-Moritz-Arndt-University, Friedrich-Ludwig-Jahn-Str. 17, 17487 Greifswald, Germany.*

### **Supplementary information**

*All synthesis refer to the general procedure D presented in the accompanying main document.*

***N*-[(1*R*,2*R*,4*S*)-4-(Benzyloxy)-2-hydroxycyclopentyl]-4-methylpentanamide (11a)**

was prepared following the general procedure E using appropriate **resin 2** and 20.0  $\mu\text{mol}$  **7a**. Yield: 89%; purity: 94% (254 nm);  $^1\text{H-NMR}$  (500 MHz,  $[\text{D}_6]\text{-DMSO}$ ) =  $\delta$  (ppm) 7.74 (d, 1H,  $J = 6.8$  Hz), 7.35-7.25 (m, 5H), 4.83 (d, 1H,  $J = 4.6$  Hz), 4.40 (s, 2H), 4.00 (m, 1H), 3.91 (m, 1H), 3.74 (m, 1H), 2.31 (m, 1H), 2.05 (t, 2H,  $J = 7.6$  Hz), 1.91 (m, 1H), 1.71 (m, 1H), 1.48 (m, 1H), 1.40 (m, 1H), 1.36 (m, 2H), 0.85 (d, 6H,  $J = 6.4$  Hz) (ESI,  $m/z$ ):  $[\text{M} + \text{Na}]^+$  calc.: 328.1889, found: 328.1899

***N*-[(1*R*,2*R*,4*S*)-4-(Benzyloxy)-2-hydroxycyclopentyl]-cyclopropanecarboxamide (11b)**

was prepared following the general procedure E using appropriate **resin 2** and 20.0  $\mu\text{mol}$  **7a**. Yield: 94%; purity: 93% (254 nm);  $^1\text{H-NMR}$  (500 MHz,  $[\text{D}_6]\text{-DMSO}$ ) =  $\delta$  (ppm) 8.05 (d, 1H,  $J = 7.1$  Hz), 7.33 (m, 4H), 7.27 (m, 1H), 4.85 (d, 1H,  $J = 4.4$  Hz), 4.40 (s, 2H), 3.99 (m, 1H), 3.94 (m, 1H), 3.76 (m, 1H), 2.33 (m, 1H), 1.93 (m, 1H), 1.71 (m, 1H), 1.55 (m, 1H), 1.41 (m, 1H), 0.63 (m, 4H) (ESI,  $m/z$ ):  $[\text{M} + \text{Na}]^+$  calc.: 298.1419, found: 298.1439

***N*-[(1*R*,2*R*,4*S*)-4-(Benzyloxy)-2-hydroxycyclopentyl]-3-cyclohexylpropanamide (11c)**

was prepared following the general procedure E using appropriate **resin 2** and 20.0  $\mu\text{mol}$  **7a**. Yield: 84%; purity: 96% (254 nm);  $^1\text{H-NMR}$  (500 MHz,  $[\text{D}_6]\text{-DMSO}$ ) =  $\delta$  (ppm) 7.72 (d, 1H,  $J = 7.3$  Hz), 7.32 (m, 4H), 7.26 (m, 1H), 4.82 (d, 1H,  $J = 4.6$  Hz), 4.40 (s, 2H), 4.00 (m, 1H), 3.91 (m, 1H), 3.74 (m, 1H), 2.31 (m, 1H), 2.05 (t, 2H,  $J = 7.8$  Hz), 1.91 (m, 1H), 1.71 (m, 1H), 1.64 (m, 4H), 1.58 (m, 1H), 1.42-1.35 (m, 3H), 1.14 (m, 4H), 0.84 (m, 2H) (ESI,  $m/z$ ):  $[\text{M} + \text{H}]^+$  calc.: 346.2382, found: 346.2392

***N*-[(1*R*,2*R*,4*S*)-4-(Benzyloxy)-2-hydroxycyclopentyl]-4-phenylbutanamide (11d)**

was prepared following the general procedure E using appropriate **resin 2** and 20.0  $\mu\text{mol}$  **7a**. Yield: 97%; purity: 96% (254 nm);  $^1\text{H-NMR}$  (500 MHz,  $[\text{D}_6]\text{-DMSO}$ ) =  $\delta$  (ppm) 7.76 (d, 1H,  $J = 7.1$  Hz), 7.34-7.25 (m, 7H) 7.17 (m, 3H), 4.83 (d, 1H,  $J = 4.6$  Hz), 4.39 (s, 2H), 3.99 (m, 1H), 3.92 (m, 1H), 3.76 (m, 1H), 2.55 (m, 2H), 2.32 (m, 1H), 2.07 (m, 2H), 1.91 (m, 1H), 1.78 (m, 2H), 1.72 (m, 1H), 1.41 (m, 1H) (ESI,  $m/z$ ):  $[\text{M} + \text{H}]^+$  calc.: 354.2069, found: 354.2108

***N*-[(1*R*,2*R*,4*S*)-4-(Benzyloxy)-2-hydroxycyclopentyl]-4-(2,4-dichlorphenoxy)-butanamide (11e)**

was prepared following the general procedure E using appropriate **resin 2** and 20.0  $\mu\text{mol}$  **7a**. Yield: 86%; purity: 97% (254 nm);  $^1\text{H-NMR}$  (500 MHz,  $[\text{D}_6]\text{-DMSO}$ ) =  $\delta$  (ppm) 7.84 (d, 1H,  $J = 7.1$  Hz), 7.55 (m, 1H), 7.35-7.29 (m, 5H), 7.26 (m, 1H), 7.15 (d, 1H,  $J = 8.9$  Hz), 4.83 (d, 1H,  $J = 4.6$  Hz), 4.39 (s, 2H), 4.05 (t, 2H,  $J = 6.3$  Hz), 3.99 (m, 2H), 3.92 (m, 1H), 3.77 (m, 1H), 2.32 (m, 1H), 2.25 (m, 2H), 1.97-1.88 (m, 3H), 1.71 (m, 1H), 1.40 (m, 1H) (ESI,  $m/z$ ):  $[\text{M} + \text{Na}]^+$  calc.: 460.1058, found: 460.1059

***N*-[(1*R*,2*R*,4*S*)-4-(Benzyloxy)-2-hydroxycyclopentyl]-4-phenoxybutanamide (11f)**

was prepared following the general procedure E using appropriate **resin 2** and 20.0  $\mu\text{mol}$  **7a**. Yield: 94%; purity: 98% (254 nm);  $^1\text{H-NMR}$  (500 MHz,  $[\text{D}_6]\text{-DMSO}$ ) =  $\delta$  (ppm) 7.84 (d, 1H,  $J = 7.3$  Hz), 7.34-7.25 (m, 7H), 6.91 (m, 3H), 4.84 (d, 1H,  $J = 4.2$  Hz), 4.39 (s, 2H), 3.99 (m, 1H), 3.94 (m, 3H), 3.77 (m, 1H), 2.33 (m, 1H), 2.23 (m, 2H), 1.91 (m, 3H), 1.71 (m, 1H), 1.40 (m, 1H) (ESI,  $m/z$ ):  $[\text{M} + \text{Na}]^+$  calc.: 392.1838, found: 392.1864

***N*-[(1*R*,2*R*,4*S*)-4-(Benzyloxy)-2-hydroxycyclopentyl]-2-(1*H*-Indol-3-yl)acetamide (11g)**

was prepared following the general procedure E using appropriate **resin 2** and 20.0  $\mu\text{mol}$  **7a**. Yield: 78%; purity: 93% (254 nm);  $^1\text{H-NMR}$  (500 MHz,  $[\text{D}_6]\text{-DMSO}$ ) =  $\delta$  (ppm) 10.82 (s, 1H), 7.84 (d, 1H,  $J = 7.3$  Hz), 7.53 (d, 1H,  $J = 7.8$  Hz), 7.34-7.26 (m, 6H), 7.16 (m, 1H), 7.05 (m, 1H), 6.95 (m, 1H), 4.84 (d, 1H,  $J = 4.6$  Hz), 4.34 (s, 2H), 4.00-3.91 (m, 2H), 3.78 (m, 1H), 3.49 (s, 2H), 2.29 (m, 1H), 1.89 (m, 1H), 1.70 (m, 1H), 1.42 (m, 1H) (ESI,  $m/z$ ):  $[\text{M} + \text{Na}]^+$  calc.: 387.1684, found: 387.1689

***N*-[(1*R*,2*R*,4*S*)-4-(Benzyloxy)-2-hydroxycyclopentyl]-2-(1*H*-Indol-3-yl)butanamide (11h)**

was prepared following the general procedure E using appropriate **resin 2** and 20.0  $\mu\text{mol}$  **7a**. Yield: 80%; purity: 98% (254 nm);  $^1\text{H-NMR}$  (500 MHz,  $[\text{D}_6]\text{-DMSO}$ ) =  $\delta$  (ppm) 10.72 (s, 1H), 7.76 (d, 1H,  $J = 7.1$  Hz), 7.49 (d, 1H,  $J = 7.8$  Hz), 7.30 (m, 5H), 7.26 (m, 1H), 7.08 (m, 1H), 7.04 (t, 1H,  $J = 7.6$  Hz), 6.95 (m, 1H), 4.84 (d, 1H,  $J = 4.4$  Hz), 4.39 (s, 2H), 3.99 (m, 1H), 3.92 (m, 1H), 3.77 (m, 1H), 2.66 (t, 2H,  $J = 7.6$  Hz), 2.33 (m, 1H), 2.12 (t, 2H,  $J = 7.5$  Hz), 1.90 (m, 1H), 1.85 (m, 2H), 1.71 (m, 1H), 1.41 (m, 1H) (ESI,  $m/z$ ):  $[\text{M} + \text{Na}]^+$  calc.: 415.1997, found: 415.1960

***N*-[(1*R*,2*R*,4*S*)-4-(Benzyloxy)-2-hydroxycyclopentyl]-2,2-diphenylacetamide (11i)**

was prepared following the general procedure E using appropriate **resin 2** and 20.0  $\mu\text{mol}$  **7a**. Yield: 93%; purity: 95% (254 nm);  $^1\text{H-NMR}$  (500 MHz,  $[\text{D}_6]\text{-DMSO}$ ) =  $\delta$  (ppm) 8.26 (d, 1H,  $J = 7.3$  Hz), 7.33-7.21 (m, 15H), 4.94 (s, 1H), 4.84 (d, 1H,  $J = 4.6$  Hz), 4.36 (s, 2H), 4.00 (m, 1H), 3.95 (m, 1H), 3.79 (m, 1H), 2.34 (m, 1H), 1.90 (m, 1H), 1.72 (m, 1H), 1.40 (m, 2H) (ESI,  $m/z$ ):  $[\text{M} + \text{Na}]^+$  calc.: 424.1889, found: 424.1896

***N*-[(1*S*,2*S*,4*S*)-4-(Benzyloxy)-2-hydroxycyclopentyl]-4-methylpentanamide (12a)**

was prepared following the general procedure E using appropriate **resin 2** and 20.0  $\mu\text{mol}$  **7b**. Yield: 87%; purity: 95% (254 nm);  $^1\text{H-NMR}$  (500 MHz,  $[\text{D}_6]\text{-DMSO}$ ) =  $\delta$  (ppm) 7.73 (d, 1H,  $J = 7.1$  Hz), 7.35-7.25 (m, 5H), 4.85 (d, 1H,  $J = 4.8$  Hz), 4.39 (s, 2H), 3.93 (m, 1H), 3.89 (m, 1H), 3.75 (m, 1H), 2.26 (m, 1H), 2.05 (t, 2H,  $J = 7.8$  Hz), 1.98 (m, 1H), 1.56 (m, 1H), 1.48 (m, 2H), 1.38 (m, 2H), 0.85 (d, 6H,  $J = 6.6$  Hz) (ESI,  $m/z$ ):  $[\text{M} + \text{Na}]^+$  calc.: 328.1889, found: 328.1903

***N*-[(1*S*,2*S*,4*S*)-4-(Benzyloxy)-2-hydroxycyclopentyl]-cyclopropanecarboxamide (12b)**

was prepared following the general procedure E using appropriate **resin 2** and 20.0  $\mu\text{mol}$  **7b**. Yield: 85%; purity: 99% (254 nm);  $^1\text{H-NMR}$  (500 MHz,  $[\text{D}_6]\text{-DMSO}$ ) =  $\delta$  (ppm) 8.01 (d, 1H,  $J = 7.1$  Hz), 7.35 (m, 4H), 7.27 (m, 1H), 4.88 (m, 1H), 4.40 (s, 2H), 3.93 (m, 2H), 3.78 (m, 1H), 2.29 (m, 1H), 2.00 (m, 1H), 1.58 (m, 1H), 1.51 (m, 2H), 0.63 (m, 4H) (ESI,  $m/z$ ):  $[\text{M} + \text{Na}]^+$  calc.: 298.1419, found: 298.1436

***N*-[(1*S*,2*S*,4*S*)-4-(Benzyloxy)-2-hydroxycyclopentyl]-3-cyclohexylpropanamide (12c)**

was prepared following the general procedure E using appropriate **resin 2** and 20.0  $\mu\text{mol}$  **7b**. Yield: 92%; purity: 98% (254 nm);  $^1\text{H-NMR}$  (500 MHz,  $[\text{D}_6]\text{-DMSO}$ ) =  $\delta$  (ppm) 7.71 (d, 1H,  $J = 7.1$  Hz), 7.31 (m, 4H), 7.26 (m, 1H), 4.84 (d, 1H,  $J = 4.8$  Hz), 4.39 (s, 2H), 3.93 (m, 1H), 3.89 (m, 1H), 3.75 (m, 1H), 2.26 (m, 1H), 2.04 (t, 2H,  $J = 7.8$  Hz), 1.98 (m, 1H), 1.65 (m, 4H), 1.58 (m, 2H), 1.50 (m, 1H), 1.37 (m, 2H), 1.14 (m, 4H), 0.85 (m, 2H) (ESI,  $m/z$ ):  $[\text{M} + \text{Na}]^+$  calc.: 368.2202, found: 368.2221

***N*-[(1*S*,2*S*,4*S*)-4-(Benzyloxy)-2-hydroxycyclopentyl]-4-phenylbutanamide (12d)** was prepared following the general procedure E using appropriate **resin 2** and 20.0  $\mu\text{mol}$  **7b**. Yield: 96%; purity: 100% (254 nm);  $^1\text{H-NMR}$  (500 MHz,  $[\text{D}_6]\text{-DMSO}$ ) =  $\delta$  (ppm) 7.73 (d, 1H,  $J = 7.1$  Hz), 7.35-7.26 (m, 7H) 7.17 (m, 3H), 4.85 (d, 1H,  $J = 4.8$  Hz), 4.39 (s, 2H), 3.92 (m, 2H), 3.76 (m, 1H), 2.55 (m, 2H), 2.26 (m, 1H), 2.06 (m, 2H), 1.98 (m, 1H), 1.78 (m, 2H), 1.57 (m, 1H), 1.50 (m, 1H) (ESI,  $m/z$ ):  $[\text{M} + \text{H}]^+$  calc.: 354.2069, found: 354.2095

***N*-[(1*S*,2*S*,4*S*)-4-(Benzyloxy)-2-hydroxycyclopentyl]-4-(2,4-dichlorphenoxy)-butanamide (12e)**

was prepared following the general procedure E using appropriate **resin 2** and 20.0 **7b**. Yield: 87%; purity: 100% (254 nm); <sup>1</sup>H-NMR (500 MHz, [D<sub>6</sub>]-DMSO) = δ (ppm) 7.81 (d, 1H, *J* = 7.3 Hz), 7.55 (m, 1H), 7.32 (m, 5H), 7.26 (m, 1H), 7.15 (d, 1H, *J* = 8.9 Hz), 4.85 (d, 1H, *J* = 5.0 Hz), 4.39 (s, 2H), 4.06 (t, 2H, *J* = 6.4 Hz), 3.93 (m, 2H), 3.76 (m, 1H), 2.28 (m, 1H), 2.25 (m, 2H), 1.98 (m, 1H), 1.94 (m, 2H), 1.57 (m, 1H), 1.50 (m, 1H) (ESI, *m/z*): [M + Na]<sup>+</sup> calc.: 460.1058, found: 460.1063

***N*-[*(1S,2S,4S)*-4-(Benzyloxy)-2-hydroxycyclopentyl]-4-phenoxybutanamide (12f)**

was prepared following the general procedure E using appropriate **resin 2** and 20.0 μmol **7b**. Yield: 96%; purity: 95% (254 nm); <sup>1</sup>H-NMR (500 MHz, [D<sub>6</sub>]-DMSO) = δ (ppm) 7.81 (d, 1H, *J* = 7.3 Hz), 7.35- 7.25 (m, 7H), 6.91 (m, 3H), 4.86 (d, 1H, *J* = 4.6 Hz), 4.39 (s, 2H), 3.93 (m, 4H), 3.77 (m, 1H), 2.28 (m, 1H), 2.23 (m, 2H), 1.98 (m, 1H), 1.92 (m, 2H), 1.57 (m, 1H), 1.49 (m, 1H) (ESI, *m/z*): [M + Na]<sup>+</sup> calc.: 392.1838, found: 392.1833

***N*-[*(1S,2S,4S)*-4-(Benzyloxy)-2-hydroxycyclopentyl]-2-(1*H*-Indol-3-yl)acetamide (12g)**

was prepared following the general procedure E using appropriate **resin 2** and 20.0 μmol **7b**. Yield: 76%; purity: 97% (254 nm); <sup>1</sup>H-NMR (500 MHz, [D<sub>6</sub>]-DMSO) = δ (ppm) 10.81 (s, 1H), 7.93 (d, 1H, *J* = 7.1 Hz), 7.53 (d, 1H, *J* = 8.0 Hz), 7.34-7.25 (m, 6H), 7.16 (m, 1H), 7.05 (m, 1H), 6.96 (m, 1H), 4.86 (d, 1H, *J* = 4.8 Hz), 4.39 (s, 2H), 3.94 (m, 2H), 3.79 (m, 1H), 3.48 (s, 2H), 2.28 (m, 1H), 1.99 (m, 1H), 1.60 (m, 1H), 1.51 (m, 1H) (ESI, *m/z*): [M + Na]<sup>+</sup> calc.: 387.1685, found: 387.1722

***N*-[*(1S,2S,4S)*-4-(Benzyloxy)-2-hydroxycyclopentyl]-2-(1*H*-Indol-3-yl)butanamide (12h)**

was prepared following the general procedure E using appropriate **resin 2** and 20.0 μmol **7b**. Yield: 80%; purity: 100% (254 nm); <sup>1</sup>H-NMR (500 MHz, [D<sub>6</sub>]-DMSO) = δ (ppm) 10.72 (s, 1H), 7.73 (d, 1H, *J* = 7.3 Hz), 7.49 (d, 1H, *J* = 7.3 Hz), 7.32 (m, 5H), 7.26 (m, 1H), 7.09 (m, 1H), 7.04 (m, 1H), 6.95 (m, 1H), 4.85 (d, 1H, *J* = 4.8 Hz), 4.39 (s, 2H), 3.93 (m, 2H), 3.76 (m, 1H), 2.67 (t, 2H, *J* = 7.4 Hz), 2.26 (m, 1H), 2.12 (t, 2H, *J* = 7.5 Hz), 1.99 (m, 1H), 1.85 (m, 2H), 1.58 (m, 1H), 1.50 (m, 1H) (ESI, *m/z*): [M + Na]<sup>+</sup> calc.: 415.1998, found: 415.2012

***N*-[*(1S,2S,4S)*-4-(Benzyloxy)-2-hydroxycyclopentyl]-2,2-diphenylacetamide (12i)**

was prepared following the general procedure E using appropriate **resin 2** and 20.0 μmol **7b**. Yield: 93%; purity: 79% (254 nm); <sup>1</sup>H-NMR (500 MHz, [D<sub>6</sub>]-DMSO) = δ (ppm) 8.28 (d, 1H, *J* = 7.3 Hz), 7.34-7.20 (m, 15H), 4.91 (s, 1H), 4.85 (d, 1H, *J* = 5.0 Hz), 4.39 (s, 2H), 3.93 (m, 2H), 3.79 (m, 1H), 2.26 (m, 1H), 2.02 (m, 1H), 1.57 (m, 1H), 1.51 (m, 2H) (ESI, *m/z*): [M + H]<sup>+</sup> calc.: 402.2069, found: 402.2101

***N*-[*(1R,2R,4S)*-2-Hydroxy-4-phenoxy-cyclopentyl]-4-methylpentanamide (13a)** was prepared following the general procedure E using appropriate **resin 2** and 20.0 μmol **7c**. Yield: 91%; purity: 76% (254 nm); <sup>1</sup>H-NMR (500 MHz, [D<sub>6</sub>]-DMSO) = δ (ppm) 7.81 (d, 1H, *J* = 6.6 Hz), 7.26 (m, 2H), 6.88 (m, 3H), 4.95 (d, 1H, *J* = 4.4 Hz), 4.78 (m, 1H), 4.00 (m, 1H), 3.82 (m, 1H), 2.55 (m, 1H), 2.06 (m, 2H), 1.97 (m, 1H), 1.93 (m, 1H), 1.46 (m, 2H), 1.38 (m, 2H), 0.85 (d, 6H, *J* = 6.6 Hz) (ESI, *m/z*): [M + H]<sup>+</sup> calc.: 292.1913, found: 292.1913

***N*-[*(1R,2R,4S)*-2-Hydroxy-4-phenoxy-cyclopentyl]-cyclopropanecarboxamide (13b)**

was prepared following the general procedure E using appropriate **resin 2** and 20.0 μmol **7c**. Yield: 88%; purity: 98% (254 nm); <sup>1</sup>H-NMR (500 MHz, [D<sub>6</sub>]-DMSO) = δ (ppm) 8.12 (d, 1H, *J* = 7.3 Hz), 7.26 (m, 2H), 6.87 (m, 3H), 4.99 (d, 1H, *J* = 4.6 Hz), 4.77 (m, 1H), 4.02 (m, 1H), 3.85 (m, 1H), 2.56 (m, 1H), 1.98 (m, 1H), 1.91 (m, 1H), 1.56 (m, 1H), 1.48 (m, 1H), 0.63 (m, 4H) (ESI, *m/z*): [M + Na]<sup>+</sup> calc.: 284.1263, found: 284.1299

***N*-[*(1R,2R,4S)*-2-Hydroxy-4-phenoxy-cyclopentyl]-3-cyclohexylpropanamide (13c)**

was prepared following the general procedure E using appropriate **resin 2** and 20.0 **7c**. Yield: 91%; purity: 90% (254 nm); <sup>1</sup>H-NMR (500 MHz, [D<sub>6</sub>]-DMSO) = δ (ppm) 7.79 (d, 1H, *J* = 7.1 Hz), 7.26 (m, 2H), 6.88 (m, 3H), 4.95 (d, 1H, *J* = 3.9 Hz), 4.78 (m, 1H), 4.00 (m, 1H), 3.82 (m, 1H), 2.54 (m, 1H), 2.06 (m, 2H), 1.96 (m, 1H), 1.93 (m, 1H), 1.64 (m, 5H), 1.46 (m, 1H), 1.37 (m, 2H), 1.14 (m, 4H), 0.84 (m, 2H) (ESI, *m/z*): [M + H]<sup>+</sup> calc.: 332.2226, found: 332.2222

***N*-[*(1R,2R,4S)*-2-Hydroxy-4-phenoxy-cyclopentyl]-4-phenylbutanamide (13d)** was prepared following the general procedure E using appropriate **resin 2** and 20.0 μmol **7c**. Yield: 97%; purity: 98% (254 nm); <sup>1</sup>H-NMR (500 MHz, [D<sub>6</sub>]-DMSO) = δ (ppm) 7.83 (d, 1H, *J* = 7.1 Hz), 7.25 (m, 4H), 7.16 (m, 3H), 6.88 (m, 3H), 4.95 (d, 1H, *J* = 4.6 Hz), 4.78 (m, 1H), 4.00 (m, 1H), 3.84 (m, 1H), 2.54 (m, 3H), 2.08 (t, 2H, *J* = 7.5 Hz), 1.97 (m, 1H), 1.91 (m, 1H), 1.78 (m, 2H), 1.48 (m, 1H) (ESI, *m/z*): [M + Na]<sup>+</sup> calc.: 362.1732, found: 362.1753

***N*-[*(1R,2R,4S)*-2-Hydroxy-4-phenoxy-cyclopentyl]-4-(2,4-dichlorphenoxy)butanamide (13e)**

was prepared following the general procedure E using appropriate **resin 2** and 20.0 μmol **7c**. Yield: 94%; purity: 97% (254 nm); <sup>1</sup>H-NMR (500 MHz, [D<sub>6</sub>]-DMSO) = δ (ppm) 7.90 (d, 1H, *J* = 7.3 Hz), 7.54 (d, 1H, *J* = 2.5 Hz), 7.34 (dd, 1H, *J* = 2.5/8.7), 7.25 (m, 2H), 7.15 (d, 1H, *J* = 8.9 Hz), 6.86 (m, 3H), 4.96 (d, 1H, *J* = 4.6 Hz), 4.78 (m, 1H), 4.05 (t, 2H, *J* = 6.4 Hz), 4.01 (m, 1H), 3.85 (m, 1H), 2.54 (m, 1H), 2.26 (m, 2H), 1.98 (m, 1H), 1.93 (m, 3H), 1.48 (m, 1H) (ESI, *m/z*): [M + Na]<sup>+</sup> calc.: 446.0902, found: 446.0924

***N*-[*(1R,2R,4S)*-2-Hydroxy-4-phenoxy-cyclopentyl]-4-phenoxybutanamide (13f)** was prepared following the general procedure E using appropriate **resin 2** and 20.0 μmol **7c**. Yield: 98%; purity: 98% (254 nm); <sup>1</sup>H-NMR (500 MHz, [D<sub>6</sub>]-DMSO) = δ (ppm) 7.89 (d, 1H, *J* = 7.6 Hz), 7.25 (m, 4H), 6.90 (m, 3H), 6.86 (m, 3H), 4.96 (d, 1H, *J* = 3.9 Hz), 4.78 (m, 1H), 4.01 (m, 1H), 3.94 (t, 2H, *J* = 6.4 Hz), 3.85 (m, 1H), 2.56 (m, 1H), 2.24 (m, 2H), 1.97 (m, 1H), 1.92 (m, 3H), 1.48 (m, 1H) (ESI, *m/z*): [M + H]<sup>+</sup> calc.: 356.1861, found: 356.1835

***N*-[*(1R,2R,4S)*-2-Hydroxy-4-phenoxy-cyclopentyl]-2-(1*H*-Indol-3-yl)acetamide (13g)**

was prepared following the general procedure E using appropriate **resin 2** and 20.0 μmol **7c**. Yield: 87%; purity: 98% (254 nm); <sup>1</sup>H-NMR (500 MHz, [D<sub>6</sub>]-DMSO) = δ (ppm) 10.83 (s, 1H), 7.85 (d, 1H, *J* = 7.1 Hz), 7.52 (d, 1H, *J* = 8.0 Hz), 7.33 (d, 1H, *J* = 8.0 Hz), 7.24 (m, 2H), 7.17 (m, 1H), 7.04 (m, 1H), 6.94-6.87 (m, 2H), 6.78 (m, 2H), 4.97 (d, 1H, *J* = 4.6 Hz), 4.78 (m, 1H), 4.02 (m, 1H), 3.87 (m, 1H), 3.50 (s, 2H), 2.52 (m, 1H), 1.94 (m, 2H), 1.49 (m, 1H) (ESI, *m/z*): [M + H]<sup>+</sup> calc.: 351.1709, found: 351.1719

***N*-[*(1R,2R,4S)*-2-Hydroxy-4-phenoxy-cyclopentyl]-2-(1*H*-Indol-3-yl)butanamide (13h)**

was prepared following the general procedure E using appropriate **resin 2** and 20.0 μmol **7c**. Yield: 79%; purity: 91% (254 nm); <sup>1</sup>H-NMR (500 MHz, [D<sub>6</sub>]-DMSO) = δ (ppm) 10.72 (s, 1H), 7.82 (d, 1H, *J* = 7.1 Hz), 7.48 (d, 1H, *J* = 8.0 Hz), 7.32 (d, 1H, *J* = 8.0 Hz), 7.25 (m, 2H), 7.08 (m, 1H), 7.04 (m, 1H), 6.94 (m, 1H), 6.87 (m, 3H), 4.96 (d, 1H, *J* = 4.1 Hz), 4.78 (m, 1H), 4.01 (m, 1H), 3.85 (m, 1H), 2.65 (t, 2H, *J* = 7.4 Hz), 2.55 (m, 1H), 2.14 (t, 2H, *J* = 7.3 Hz), 1.98 (m, 1H), 1.92 (m, 1H), 1.85 (m, 2H), 1.49 (m, 1H) (ESI, *m/z*): [M + H]<sup>+</sup> calc.: 379.2022, found: 379.2052

**N-[(1R,2R,4S)-2-Hydroxy-4-phenoxy-cyclopentyl]-2,2-diphenylacetamide (13i)** was prepared following the general procedure E using appropriate **resin 2** and 20.0  $\mu\text{mol}$  **7c**. Yield: 89%; purity: 97% (254 nm);  $^1\text{H-NMR}$  (500 MHz,  $[\text{D}_6]-\text{DMSO}$ ) =  $\delta$  (ppm) 8.31 (d, 1H,  $J = 7.3$  Hz), 7.26 (m, 12H), 6.88 (m, 3H), 4.96 (m, 2H), 4.78 (m, 1H), 4.04 (m, 1H), 3.87 (m, 1H), 2.55 (m, 1H), 1.98 (m, 1H), 1.92 (m, 1H), 1.47 (m, 1H) (ESI,  $m/z$ ):  $[\text{M} + \text{H}]^+$  calc.: 388.1913, found: 388.1929

**N-[(1R,2R,4S)-2-Hydroxy-4-phenoxy-cyclopentyl]-4-(1,1'-biphenyl-4-yl)-4-oxobutanamide (13j)** was prepared following the general procedure E using appropriate **resin 2** and 20.0  $\mu\text{mol}$  **7c**. Yield: 84%; purity: 87% (254 nm);  $^1\text{H-NMR}$  (500 MHz,  $[\text{D}_6]-\text{DMSO}$ ) =  $\delta$  (ppm) 8.04 (d, 2H,  $J = 8.3$  Hz), 7.97 (d, 1H,  $J = 7.1$  Hz), 7.82 (d, 2H,  $J = 8.3$  Hz), 7.74 (d, 2H,  $J = 7.8$  Hz), 7.51 (m, 2H), 7.43 (m, 1H), 7.26 (m, 2H), 6.88 (m, 3H), 4.97 (d, 1H,  $J = 4.4$  Hz), 4.79 (m, 1H), 4.03 (m, 1H), 3.84 (m, 1H), 3.26 (m, 2H), 2.56 (m, 1H), 2.52 (m, 2H), 1.99 (m, 1H), 1.92 (m, 1H), 1.50 (m, 1H) (ESI,  $m/z$ ):  $[\text{M} + \text{H}]^+$  calc.: 430.2018, found: 430.1993

**N-[(1S,2S,4S)-2-Hydroxy-4-phenoxy-cyclopentyl]-4-methylpentanamide (14a)** was prepared following the general procedure E using appropriate **resin 2** and 20.0  $\mu\text{mol}$  **7d**. Yield: 87%; purity: 97% (254 nm);  $^1\text{H-NMR}$  (500 MHz,  $[\text{D}_6]-\text{DMSO}$ ) =  $\delta$  (ppm) 7.78 (d, 1H,  $J = 7.1$  Hz), 7.26 (m, 2H), 6.88 (m, 3H), 4.94 (d, 1H,  $J = 4.8$  Hz), 4.74 (m, 1H), 3.96 (m, 1H), 3.85 (m, 1H), 2.47 (m, 1H), 2.06 (t, 2H,  $J = 7.8$  Hz), 2.02 (m, 1H), 1.77 (m, 1H), 1.54 (m, 1H), 1.48 (m, 1H), 1.39 (m, 2H), 0.85 (d, 6H,  $J = 6.6$  Hz) (ESI,  $m/z$ ):  $[\text{M} + \text{Na}]^+$  calc.: 314.1732, found: 314.1734

**N-[(1S,2S,4S)-2-Hydroxy-4-phenoxy-cyclopentyl]-cyclopropan-carboxamide (14b)** was prepared following the general procedure E using appropriate **resin 2** and 20.0  $\mu\text{mol}$  **7d**. Yield: 91%; purity: 100% (254 nm);  $^1\text{H-NMR}$  (500 MHz,  $[\text{D}_6]-\text{DMSO}$ ) =  $\delta$  (ppm) 8.07 (d, 1H,  $J = 6.8$  Hz), 7.26 (m, 2H), 6.88 (m, 3H), 4.97 (d, 1H,  $J = 4.4$  Hz), 4.74 (m, 1H), 3.99 (m, 1H), 3.87 (m, 1H), 2.48 (m, 1H), 2.05 (m, 1H), 1.79 (m, 1H), 1.54 (m, 2H), 0.64 (m, 4H) (ESI,  $m/z$ ):  $[\text{M} + \text{Na}]^+$  calc.: 284.1263, found: 284.1266

**N-[(1S,2S,4S)-2-Hydroxy-4-phenoxy-cyclopentyl]-3-cyclohexylpropanamide (14c)** was prepared following the general procedure E using appropriate **resin 2** and 20.0  $\mu\text{mol}$  **7d**. Yield: 85%; purity: 100% (254 nm);  $^1\text{H-NMR}$  (500 MHz,  $[\text{D}_6]-\text{DMSO}$ ) =  $\delta$  (ppm) 7.77 (d, 1H,  $J = 7.3$  Hz), 7.26 (m, 2H), 6.88 (m, 3H), 4.93 (d, 1H,  $J = 4.8$  Hz), 4.74 (m, 1H), 3.96 (m, 1H), 3.84 (m, 1H), 2.47 (m, 1H), 2.06-2.02 (m, 3H), 1.77 (m, 1H), 1.65 (m, 5H), 1.55 (m, 1H), 1.39 (m, 2H), 1.16 (m, 4H), 0.86 (m, 2H) (ESI,  $m/z$ ):  $[\text{M} + \text{Na}]^+$  calc.: 354.2045, found: 354.2039

**N-[(1S,2S,4S)-2-Hydroxy-4-phenoxy-cyclopentyl]-4-phenylbutanamide (14d)** was prepared following the general procedure E using appropriate **resin 2** and 20.0  $\mu\text{mol}$  **7d**. Yield: 93%; purity: 100% (254 nm);  $^1\text{H-NMR}$  (500 MHz,  $[\text{D}_6]-\text{DMSO}$ ) =  $\delta$  (ppm) 7.80 (d, 1H,  $J = 7.1$  Hz), 7.26 (m, 4H), 7.17 (m, 3H), 6.88 (m, 3H), 4.95 (m, 1H), 4.74 (m, 1H), 3.98 (m, 1H), 3.84 (m, 1H), 2.56 (m, 2H), 2.47 (m, 1H), 2.08 (m, 2H), 2.03 (m, 1H), 1.79 (m, 3H), 1.55 (m, 1H) (ESI,  $m/z$ ):  $[\text{M} + \text{Na}]^+$  calc.: 362.1732, found: 362.1729

**N-[(1S,2S,4S)-2-Hydroxy-4-phenoxy-cyclopentyl]-4-(2,4-dichlorphenoxy)butanamide (14e)** was prepared following the general procedure E using appropriate **resin 2** and 20.0  $\mu\text{mol}$  **7d**. Yield: 86%; purity: 100% (254 nm);  $^1\text{H-NMR}$  (500 MHz,  $[\text{D}_6]-\text{DMSO}$ ) =  $\delta$  (ppm) 7.87 (d, 1H,  $J = 7.3$  Hz), 7.55 (d, 1H,  $J = 2.5$  Hz), 7.35 (dd, 1H,  $J = 2.5/8.7$ ), 7.26 (m, 2H), 7.16 (d, 1H,  $J = 8.9$  Hz), 6.88 (m, 3H), 4.94 (bs, 1H), 4.73 (m, 1H), 4.06 (t, 2H,  $J = 6.3$  Hz), 3.99 (m, 1H), 3.85 (m, 1H), 2.47 (m, 1H), 2.27 (m, 2H), 2.03 (m, 1H), 1.95 (m, 2H), 1.77 (m, 1H), 1.55 (m, 1H) (ESI,  $m/z$ ):  $[\text{M} + \text{Na}]^+$  calc.: 446.0902, found: 446.0878

**N-[(1S,2S,4S)-2-Hydroxy-4-phenoxy-cyclopentyl]-4-phenoxybutanamide (14f)** was prepared following the general procedure E using appropriate **resin 2** and 20.0  $\mu\text{mol}$  **7d**. Yield: 91%; purity: 99% (254 nm);  $^1\text{H-NMR}$  (500 MHz,  $[\text{D}_6]-\text{DMSO}$ ) =  $\delta$  (ppm) 7.86 (d, 1H,  $J = 7.1$  Hz), 7.26 (m, 4H), 6.91 (m, 4H), 6.86 (m, 2H), 4.94 (d, 1H,  $J = 4.8$  Hz), 4.73 (m, 1H), 3.99 (m, 1H), 3.95 (t, 2H,  $J = 6.4$  Hz), 3.86 (m, 1H), 2.46 (m, 1H), 2.25 (m, 2H), 2.03 (m, 1H), 1.93 (m, 2H), 1.77 (m, 1H), 1.55 (m, 1H) (ESI,  $m/z$ ):  $[\text{M} + \text{H}]^+$  calc.: 356.1862, found: 356.1895

**N-[(1S,2S,4S)-2-Hydroxy-4-phenoxy-cyclopentyl]-2-(1H-Indol-3-yl)acetamide (14g)** was prepared following the general procedure E using appropriate **resin 2** and 20.0  $\mu\text{mol}$  **7d**. Yield: 83%; purity: 86% (254 nm);  $^1\text{H-NMR}$  (500 MHz,  $[\text{D}_6]-\text{DMSO}$ ) =  $\delta$  (ppm) 10.82 (s, 1H), 7.98 (d, 1H,  $J = 7.1$  Hz), 7.55 (d, 1H,  $J = 8.0$  Hz), 7.32 (m, 1H), 7.26 (m, 2H), 7.17 (m, 1H), 7.05 (m, 1H), 6.96 (m, 1H), 6.88 (m, 3H), 4.95 (d, 1H,  $J = 4.8$  Hz), 4.75 (m, 1H), 3.99 (m, 1H), 3.89 (m, 1H), 3.50 (s, 2H), 2.48 (m, 1H), 2.04 (m, 1H), 1.80 (m, 1H), 1.56 (m, 1H) (ESI,  $m/z$ ):  $[\text{M} + \text{Na}]^+$  calc.: 373.1528, found: 373.1522

**N-[(1S,2S,4S)-2-Hydroxy-4-phenoxy-cyclopentyl]-2-(1H-Indol-3-yl)butanamide (14h)** was prepared following the general procedure E using appropriate **resin 2** and 20.0  $\mu\text{mol}$  **7d**. Yield: 78%; purity: 93% (254 nm);  $^1\text{H-NMR}$  (500 MHz,  $[\text{D}_6]-\text{DMSO}$ ) =  $\delta$  (ppm) 10.73 (s, 1H), 7.79 (d, 1H,  $J = 7.1$  Hz), 7.49 (d, 1H,  $J = 8.0$  Hz), 7.31 (m, 1H), 7.26 (m, 2H), 7.09 (m, 1H), 7.04 (m, 1H), 6.95 (m, 1H), 6.88 (m, 3H), 4.94 (d, 1H,  $J = 4.8$  Hz), 4.74 (m, 1H), 3.99 (m, 1H), 3.86 (m, 1H), 2.67 (t, 2H,  $J = 7.3$  Hz), 2.47 (m, 1H), 2.14 (t, 2H,  $J = 7.4$  Hz), 2.04 (m, 1H), 1.86 (m, 2H), 1.78 (m, 1H), 1.55 (m, 1H) (ESI,  $m/z$ ):  $[\text{M} + \text{Na}]^+$  calc.: 401.1841, found: 401.1864

**N-[(1S,2S,4S)-2-Hydroxy-4-phenoxy-cyclopentyl]-2,2-diphenylacetamide (14i)** was prepared following the general procedure E using appropriate **resin 2** and 20.0  $\mu\text{mol}$  **7d**. Yield: 88%; purity: 95% (254 nm);  $^1\text{H-NMR}$  (500 MHz,  $[\text{D}_6]-\text{DMSO}$ ) =  $\delta$  (ppm) 8.35 (d, 1H,  $J = 6.8$  Hz), 7.31-7.20 (m, 12H), 6.88 (m, 3H), 4.95 (d, 1H,  $J = 5.3$  Hz), 4.93 (s, 1H), 4.73 (m, 1H), 4.00 (m, 1H), 3.88 (m, 1H), 2.47 (m, 1H), 2.06 (m, 1H), 1.77 (m, 1H), 1.57 (m, 1H) (ESI,  $m/z$ ):  $[\text{M} + \text{Na}]^+$  calc.: 410.1732, found: 410.1737

**N-[(1S,2S,4S)-2-Hydroxy-4-phenoxy-cyclopentyl]-4-(1,1'-biphenyl-4-yl)-4-oxobutanamide (14j)** was prepared following the general procedure E using appropriate **resin 2** and 20.0  $\mu\text{mol}$  **7d**. Yield: 90%; purity: 89% (254 nm);  $^1\text{H-NMR}$  (500 MHz,  $[\text{D}_6]-\text{DMSO}$ ) =  $\delta$  (ppm) 8.05 (d, 2H,  $J = 8.5$  Hz), 7.94 (d, 1H,  $J = 7.1$  Hz), 7.82 (d, 2H,  $J = 8.5$  Hz), 7.75 (m, 2H), 7.51 (m, 2H), 7.43 (m, 1H), 7.26 (m, 2H), 6.88 (m, 3H), 4.95 (d, 1H,  $J = 4.8$  Hz), 4.76 (m, 1H), 3.98 (m, 1H), 3.88 (m, 1H), 3.26 (m, 2H), 2.52 (m, 2H), 2.49 (m, 1H), 2.05 (m, 1H), 1.81 (m, 1H), 1.57 (m, 1H) (ESI,  $m/z$ ):  $[\text{M} + \text{Na}]^+$  calc.: 452.1838, found: 452.1838

**N-[(1R,2R,4S)-4-(1,1'-Biphenyl-4-yloxy)-2-hydroxycyclopentyl]-4-methylpentanamide (15a)** was prepared following the general procedure E using appropriate **resin 2** and 20.0  $\mu\text{mol}$  **7e**. Yield: 92%; purity: 88% (254 nm);  $^1\text{H-NMR}$  (500 MHz,  $[\text{D}_6]-\text{DMSO}$ ) =  $\delta$  (ppm) 7.81 (d, 1H,  $J = 7.1$  Hz), 7.58 (m, 4H), 7.42 (m, 2H), 7.29 (m, 1H), 6.96 (m, 2H), 4.97 (d, 1H,  $J = 4.4$  Hz), 4.84 (m, 1H), 4.02 (m, 1H), 3.84 (m, 1H), 2.57 (m, 1H), 2.07 (m, 2H), 2.01 (m, 1H), 1.95 (m, 1H), 1.50 (m, 2H), 1.38 (m, 2H), 0.85 (d, 6H,  $J = 6.6$  Hz) (ESI,  $m/z$ ):  $[\text{M} + \text{Na}]^+$  calc.: 390.2045, found: 390.2048

**N-[(1R,2R,4S)-4-(1,1'-Biphenyl-4-yloxy)-2-hydroxycyclopentyl]-cyclopropan-carboxamide (15b)** was prepared following the general procedure E using appropriate **resin 2** and 20.0  $\mu\text{mol}$  **7e**. Yield: 89%; purity: 93% (254 nm);  $^1\text{H-NMR}$  (500 MHz,  $[\text{D}_6]-\text{DMSO}$ ) =  $\delta$  (ppm) 8.13 (d, 1H,  $J = 7.3$  Hz), 7.58 (m, 4H), 7.42 (m, 2H), 7.30 (m, 1H), 6.97 (m, 2H), 5.00 (d,

1H,  $J = 4.6$  Hz), 4.84 (m, 1H), 4.04 (m, 1H), 3.87 (m, 1H), 2.59 (m, 1H), 2.02 (m, 1H), 1.95 (m, 1H), 1.59-1.49 (m, 2H), 0.65 (m, 4H) (ESI,  $m/z$ ): [M + Na]<sup>+</sup> calc.: 360.1576, found: 360.1554

***N*-[(1*R*,2*R*,4*S*)-4-(1,1'-Biphenyl-4-yloxy)-2-hydroxycyclopentyl]-3-cyclohexyl-propanamide (15c)**

was prepared following the general procedure E using appropriate resin 2 and 20.0 μmol 7e. Yield: 94%; purity: 81% (254 nm); <sup>1</sup>H-NMR (500 MHz, [D<sub>6</sub>]-DMSO) = δ (ppm) 7.81 (d, 1H,  $J = 7.1$  Hz), 7.60 (m, 4H), 7.42 (m, 2H), 7.29 (t, 1H,  $J = 7.3$  Hz), 6.95 (d, 2H,  $J = 8.7$  Hz), 4.97 (d, 1H,  $J = 4.6$  Hz), 4.84 (m, 1H), 4.02 (m, 1H), 3.84 (m, 1H), 2.57 (m, 1H), 2.07 (m, 2H), 2.02 (m, 1H), 1.95 (m, 1H), 1.64 (m, 4H), 1.59 (m, 1H), 1.50 (m, 1H), 1.38 (m, 2H), 1.14 (m, 4H), 0.85 (m, 2H) (ESI,  $m/z$ ): [M + Na]<sup>+</sup> calc.: 430.2358, found: 430.2386

***N*-[(1*R*,2*R*,4*S*)-4-(1,1'-Biphenyl-4-yloxy)-2-hydroxycyclopentyl]-4-phenylbutanamide (15d)**

was prepared following the general procedure E using appropriate resin 2 and 20.0 μmol 7e. Yield: 92%; purity: 94% (254 nm); <sup>1</sup>H-NMR (500 MHz, [D<sub>6</sub>]-DMSO) = δ (ppm) 7.84 (d, 1H,  $J = 7.3$  Hz), 7.58 (m, 4H), 7.42 (m, 2H), 7.31-7.25 (m, 3H), 7.17 (m, 3H), 6.95 (m, 2H), 4.97 (d, 1H,  $J = 4.4$  Hz), 4.84 (m, 1H), 4.04 (m, 1H), 3.86 (m, 1H), 2.59 (m, 1H), 2.54 (m, 2H), 2.10 (t, 2H,  $J = 7.4$  Hz), 2.01 (m, 1H), 1.97 (m, 1H), 1.78 (m, 2H), 1.52 (m, 1H) (ESI,  $m/z$ ): [M + Na]<sup>+</sup> calc.: 438.2045, found: 438.2058

***N*-[(1*R*,2*R*,4*S*)-4-(1,1'-Biphenyl-4-yloxy)-2-hydroxycyclopentyl]-4-(2,4-dichlorphenoxy) butanamide (15e)**

was prepared following the general procedure E using appropriate resin 2 and 20.0 μmol 7e. Yield: 95%; purity: 86% (254 nm); <sup>1</sup>H-NMR (500 MHz, [D<sub>6</sub>]-DMSO) = δ (ppm) 7.92 (d, 1H,  $J = 7.3$  Hz), 7.58 (m, 5H), 7.42 (m, 2H), 7.34-7.28 (m, 2H), 7.16 (m, 1H), 6.94 (m, 2H), 4.97 (d, 1H,  $J = 4.6$  Hz), 4.84 (m, 1H), 4.06 (m, 3H), 3.87 (m, 1H), 2.57 (m, 1H), 2.27 (m, 2H), 2.02 (m, 1H), 1.95 (m, 3H), 1.53 (m, 1H) (ESI,  $m/z$ ): [M + Na]<sup>+</sup> calc.: 522.1215, found: 522.1236

***N*-[(1*R*,2*R*,4*S*)-4-(1,1'-Biphenyl-4-yloxy)-2-hydroxycyclopentyl]-4-phenoxybutanamide (15f)**

was prepared following the general procedure E using appropriate resin 2 and 20.0 μmol 7e. Yield: 98%; purity: 95% (254 nm); <sup>1</sup>H-NMR (500 MHz, [D<sub>6</sub>]-DMSO) = δ (ppm) 7.91 (d, 1H,  $J = 7.1$  Hz), 7.57 (m, 4H), 7.42 (m, 2H), 7.27 (m, 3H), 6.95 (d, 2H,  $J = 8.8$  Hz), 6.90 (m, 3H), 4.98 (d, 1H,  $J = 4.6$  Hz), 4.84 (m, 1H), 4.03 (m, 1H), 3.94 (t, 2H,  $J = 6.5$  Hz), 3.87 (m, 1H), 2.58 (m, 1H), 2.25 (m, 2H), 2.01 (m, 1H), 1.94 (m, 3H), 1.51 (m, 1H) (ESI,  $m/z$ ): [M + Na]<sup>+</sup> calc.: 454.1994, found: 454.1994

***N*-[(1*R*,2*R*,4*S*)-4-(1,1'-Biphenyl-4-yloxy)-2-hydroxycyclopentyl]-2-(1*H*-indol-3-yl)acetamide (15g)**

was prepared following the general procedure E using appropriate resin 2 and 20.0 μmol 7e. Yield: 92%; purity: 90% (254 nm); <sup>1</sup>H-NMR (500 MHz, [D<sub>6</sub>]-DMSO) = δ (ppm) 10.84 (s, 1H), 7.86 (d, 1H,  $J = 7.3$  Hz), 7.56 (m, 5H), 7.42 (m, 2H), 7.32 (m, 2H), 7.18 (m, 1H), 7.04 (m, 1H), 6.94 (m, 1H), 6.88 (m, 2H), 4.99 (d, 1H,  $J = 4.6$  Hz), 4.85 (m, 1H), 4.05 (m, 1H), 3.89 (m, 1H), 3.52 (s, 2H), 2.54 (m, 1H), 1.97 (m, 2H), 1.54 (m, 1H) (ESI,  $m/z$ ): [M + Na]<sup>+</sup> calc.: 449.1841, found: 449.1865

***N*-[(1*R*,2*R*,4*S*)-4-(1,1'-Biphenyl-4-yloxy)-2-hydroxycyclopentyl]-4-(1,1'-biphenyl-4-yl)-4-oxobutanamide (15j)**

was prepared following the general procedure E using appropriate resin 2 and 20.0 μmol 7e. Yield: 98%; purity: 96% (254 nm); <sup>1</sup>H-NMR (500 MHz, [D<sub>6</sub>]-DMSO) = δ (ppm) 8.04 (d, 2H,  $J = 8.5$  Hz), 7.98 (d, 1H,  $J = 7.1$  Hz), 7.82 (d, 2H,  $J = 8.3$  Hz), 7.74 (d, 2H,  $J = 7.3$  Hz), 7.59 (m, 4H), 7.50 (m, 2H), 7.42 (m, 3H), 7.30 (t, 1H,  $J = 7.3$  Hz), 6.97 (d, 2H,  $J = 8.7$  Hz), 4.98 (m, 1H), 4.85 (m, 1H), 4.06 (m, 1H), 3.86 (m, 1H), 3.26 (t, 2H,  $J = 6.5$  Hz), 2.56 (m, 1H), 2.51 (m, 2H), 2.04 (m, 1H), 1.96 (m, 1H), 1.54 (m, 1H) (ESI,  $m/z$ ): [M + Na]<sup>+</sup> calc.: 528.2151, found: 528.2179

***N*-[(1*S*,2*S*,4*S*)-4-(1,1'-Biphenyl-4-yloxy)-2-hydroxycyclopentyl]-4-methylpentanamide (16a)**

was prepared following the general procedure E using appropriate resin 2 and 20.0 μmol 7f. Yield: 87%; purity: 100% (254 nm); <sup>1</sup>H-NMR (500 MHz, [D<sub>6</sub>]-DMSO) = δ (ppm) 7.82 (d, 1H,  $J = 7.1$  Hz), 7.59 (m, 4H), 7.42 (m, 2H), 7.30 (m, 1H), 6.95 (d, 2H,  $J = 8.7$  Hz), 4.97 (m, 1H), 4.81 (m, 1H), 3.98 (m, 1H), 3.87 (m, 1H), 2.53 (m, 1H), 2.07 (m, 3H), 1.80 (m, 1H), 1.59 (m, 1H), 1.50 (m, 1H), 1.38 (m, 2H), 0.86 (d, 6H,  $J = 6.6$  Hz) (ESI,  $m/z$ ): [M + Na]<sup>+</sup> calc.: 390.2045, found: 390.2032

***N*-[(1*S*,2*S*,4*S*)-4-(1,1'-Biphenyl-4-yloxy)-2-hydroxycyclopentyl]-cyclopropane carboxamide (16b)**

was prepared following the general procedure E using appropriate resin 2 and 20.0 μmol 7f. Yield: 90%; purity: 100% (254 nm); <sup>1</sup>H-NMR (500 MHz, [D<sub>6</sub>]-DMSO) = δ (ppm) 8.09 (d, 1H,  $J = 7.1$  Hz), 7.59 (m, 4H), 7.42 (m, 2H), 7.30 (t, 1H,  $J = 7.3$  Hz), 6.97 (m, 2H), 4.99 (d, 1H,  $J = 5.0$  Hz), 4.81 (m, 1H), 4.01 (m, 1H), 3.89 (m, 1H), 2.54 (m, 1H), 2.08 (m, 1H), 1.82 (m, 1H), 1.59 (m, 1H), 1.54 (m, 1H), 0.65 (m, 4H) (ESI,  $m/z$ ): [M + Na]<sup>+</sup> calc.: 360.1576, found: 360.1561

***N*-[(1*S*,2*S*,4*S*)-4-(1,1'-Biphenyl-4-yloxy)-2-hydroxycyclopentyl]-3-cyclohexyl-propanamide (16c)**

was prepared following the general procedure E using appropriate resin 2 and 20.0 μmol 7f. Yield: 94%; purity: 99% (254 nm); <sup>1</sup>H-NMR (500 MHz, [D<sub>6</sub>]-DMSO) = δ (ppm) 7.78 (d, 1H,  $J = 7.1$  Hz), 7.58 (m, 4H), 7.42 (m, 2H), 7.30 (m, 1H), 6.95 (d, 2H,  $J = 8.7$  Hz), 4.95 (d, 1H,  $J = 4.8$  Hz), 4.80 (m, 1H), 3.98 (m, 1H), 3.86 (m, 1H), 2.53 (m, 1H), 2.07 (m, 3H), 1.80 (m, 1H), 1.66 (m, 4H), 1.60 (m, 2H), 1.39 (m, 2H), 1.16 (m, 4H), 0.86 (m, 2H) (ESI,  $m/z$ ): [M + Na]<sup>+</sup> calc.: 430.2358, found: 430.2346

***N*-[(1*S*,2*S*,4*S*)-4-(1,1'-Biphenyl-4-yloxy)-2-hydroxycyclopentyl]-4-phenylbutanamide (16d)**

was prepared following the general procedure E using appropriate resin 2 and 20.0 μmol 7f. Yield: 98%; purity: 99% (254 nm); <sup>1</sup>H-NMR (500 MHz, [D<sub>6</sub>]-DMSO) = δ (ppm) 7.81 (d, 1H,  $J = 7.3$  Hz), 7.59 (m, 4H), 7.42 (m, 2H), 7.31-7.26 (m, 3H), 7.18 (m, 3H), 6.94 (m, 2H), 4.96 (d, 1H,  $J = 4.8$  Hz), 4.80 (m, 1H), 4.01 (m, 1H), 3.87 (m, 1H), 2.56 (m, 2H), 2.52 (m, 1H), 2.09 (m, 3H), 1.84-1.77 (m, 2H), 1.59 (m, 1H) (ESI,  $m/z$ ): [M + Na]<sup>+</sup> calc.: 438.2045, found: 438.2064

***N*-[(1*S*,2*S*,4*S*)-4-(1,1'-Biphenyl-4-yloxy)-2-hydroxycyclopentyl]-4-(2,4-dichlorphenoxy) butanamide (16e)**

was prepared following the general procedure E using appropriate resin 2 and 20.0 μmol 7f. Yield: 93%; purity: 100% (254 nm); <sup>1</sup>H-NMR (500 MHz, [D<sub>6</sub>]-DMSO) = δ (ppm) 7.89 (d, 1H,  $J = 7.3$  Hz), 7.58 (m, 5H), 7.42 (m, 2H), 7.35 (dd, 1H,  $J = 2.52/8.94$  Hz), 7.3 (t, 1H,  $J = 7.3$  Hz), 7.16 (m, 1H), 6.96 (m, 2H), 4.96 (d, 1H,  $J = 4.8$  Hz), 4.79 (m, 1H), 4.07 (t, 2H,  $J = 6.3$  Hz), 4.02 (m, 1H), 3.88 (m, 1H), 2.53 (m, 1H), 2.28 (m, 2H), 2.07 (m, 1H), 1.96 (m, 2H), 1.81 (m, 1H), 1.58 (m, 1H) (ESI,  $m/z$ ): [M + Na]<sup>+</sup> calc.: 522.1215, found: 522.1217

***N*-[(1*S*,2*S*,4*S*)-4-(1,1'-Biphenyl-4-yloxy)-2-hydroxycyclopentyl]-4-phenoxybutanamide (16f)**

was prepared following the general procedure E using appropriate resin 2 and 20.0 μmol 7f. Yield: 96%; purity: 96% (254 nm); <sup>1</sup>H-NMR (500 MHz, [D<sub>6</sub>]-DMSO) = δ (ppm) 7.88 (d, 1H,  $J = 7.3$  Hz), 7.58 (m, 4H), 7.42 (m, 2H), 7.31-7.26 (m, 3H), 6.95-6.89 (m, 5H), 4.96 (d, 1H,  $J = 4.8$  Hz), 4.79 (m, 1H), 4.02 (m, 1H), 3.96 (t, 2H,  $J = 6.4$  Hz), 3.88 (m, 1H), 2.53 (m, 1H), 2.26 (m, 2H), 2.07 (m, 1H), 1.93 (m, 2H), 1.81 (m, 1H), 1.58 (m, 1H) (ESI,  $m/z$ ): [M + Na]<sup>+</sup> calc.: 454.1994, found: 454.2022

***N*-[(1*S*,2*S*,4*S*)-4-(1,1'-Biphenyl-4-yloxy)-2-hydroxycyclopentyl]-2-(1*H*-indol-3-yl)acetamide (16g)**

was prepared following the general procedure E using appropriate **resin 2** and 20.0  $\mu\text{mol}$  **7f**. Yield: 89%; purity: 87% (254 nm);  $^1\text{H-NMR}$  (500 MHz,  $[\text{D}_6]\text{-DMSO}$ ) =  $\delta$  (ppm) 10.82 (s, 1H), 8.00 (d, 1H,  $J = 7.1$  Hz), 7.58 (m, 5H), 7.42 (m, 2H), 7.31 (m, 2H), 7.18 (s, 1H), 7.06 (t, 1H,  $J = 7.1$  Hz), 6.95 (m, 3H), 4.98 (d, 1H,  $J = 4.8$  Hz), 4.81 (m, 1H), 4.01 (m, 1H), 3.91 (m, 1H), 3.51 (s, 2H), 2.54 (m, 1H), 2.07 (m, 1H), 1.84 (m, 1H), 1.60 (m, 1H) (ESI,  $m/z$ ):  $[\text{M} + \text{Na}]^+$  calc.: 449.1841, found: 449.1862

***N*-[(1*S*,2*S*,4*S*)-4-(1,1'-Biphenyl-4-yloxy)-2-hydroxycyclopentyl]-2-(1*H*-Indol-3-yl)butanamide (16h)**

was prepared following the general procedure E using appropriate **resin 2** and 20.0  $\mu\text{mol}$  **7f**. Yield: 89%; purity: 92% (254 nm);  $^1\text{H-NMR}$  (500 MHz,  $[\text{D}_6]\text{-DMSO}$ ) =  $\delta$  (ppm) 10.73 (s, 1H), 7.81 (d, 1H,  $J = 7.3$  Hz), 7.58 (m, 4H), 7.50 (d, 1H,  $J = 8.0$  Hz), 7.42 (m, 2H), 7.31 (m, 2H), 7.09 (s, 1H), 7.05 (m, 1H), 6.96 (m, 3H), 4.96 (d, 1H,  $J = 4.8$  Hz), 4.80 (m, 1H), 4.02 (m, 1H), 3.88 (m, 1H), 2.67 (t, 2H,  $J = 7.4$  Hz), 2.53 (m, 1H), 2.15 (t, 2H,  $J = 7.4$  Hz), 2.07 (m, 1H), 1.87 (m, 2H), 1.81 (m, 1H), 1.58 (m, 1H) (ESI,  $m/z$ ):  $[\text{M} + \text{Na}]^+$  calc.: 477.2154, found: 477.2142

***N*-[(1*S*,2*S*,4*S*)-4-(1,1'-Biphenyl-4-yloxy)-2-hydroxycyclopentyl]-4-(1,1'-biphenyl-4-yl)-4-oxobutanamide (16j)**

was prepared following the general procedure E using appropriate **resin 2** and 20.0  $\mu\text{mol}$  **7f**. Yield: 96%; purity: 91% (254 nm);  $^1\text{H-NMR}$  (500 MHz,  $[\text{D}_6]\text{-DMSO}$ ) =  $\delta$  (ppm) 8.06 (d, 2H,  $J = 8.3$  Hz), 7.95 (d, 1H,  $J = 7.3$  Hz), 7.83 (d, 2H,  $J = 8.5$  Hz), 7.75 (d, 2H,  $J = 7.3$  Hz), 7.59 (m, 4H), 7.50 (m, 2H), 7.42 (m, 3H), 7.30 (t, 1H,  $J = 7.3$  Hz), 6.96 (d, 2H,  $J = 8.7$  Hz), 4.97 (d, 1H,  $J = 4.6$  Hz), 4.83 (m, 1H), 4.00 (m, 1H), 3.90 (m, 1H), 3.26 (m, 2H), 2.54 (m, 1H), 2.51 (m, 2H), 2.09 (m, 1H), 1.85 (m, 1H), 1.60 (m, 1H) (ESI,  $m/z$ ):  $[\text{M} + \text{Na}]^+$  calc.: 528.2151, found: 528.2187

***N*-[(1*R*,2*R*,4*S*)-4-(1,4-Dihydronaphthalen-1-ylmethoxy)-2-hydroxycyclopentyl]-4-methylpentanamide (17a)**

was prepared following the general procedure E using appropriate **resin 2** and 20.0  $\mu\text{mol}$  **7g**. Yield: 85%; purity: 100% (254 nm);  $^1\text{H-NMR}$  (500 MHz,  $[\text{D}_6]\text{-DMSO}$ ) =  $\delta$  (ppm) 8.07 (d, 1H,  $J = 7.9$  Hz), 7.93 (m, 1H), 7.87 (d, 1H,  $J = 8.2$  Hz), 7.73 (d, 1H,  $J = 7.1$  Hz), 7.54 (m, 3H), 7.46 (m, 1H), 4.84 (m, 3H), 4.12 (m, 1H), 3.92 (m, 1H), 3.75 (m, 1H), 2.35 (m, 1H), 2.03 (t, 2H,  $J = 7.7$  Hz), 1.96 (m, 1H), 1.75 (m, 1H), 1.46 (m, 2H), 1.36 (m, 2H), 0.83 (d, 6H,  $J = 6.4$  Hz) (ESI,  $m/z$ ):  $[\text{M} + \text{Na}]^+$  calc.: 378.2045, found: 378.2044

***N*-[(1*R*,2*R*,4*S*)-4-(1,4-Dihydronaphthalen-1-ylmethoxy)-2-hydroxycyclopentyl]cyclopropanecarboxamide (17b)**

was prepared following the general procedure E using appropriate **resin 2** and 20.0  $\mu\text{mol}$  **7g**. Yield: 90%; purity: 98% (254 nm);  $^1\text{H-NMR}$  (500 MHz,  $[\text{D}_6]\text{-DMSO}$ ) =  $\delta$  (ppm) 8.07 (m, 2H), 7.94 (d, 1H,  $J = 7.8$  Hz), 7.87 (d, 1H,  $J = 8.0$  Hz), 7.54 (m, 3H), 7.47 (m, 1H), 4.86 (m, 3H), 4.11 (m, 1H), 3.94 (m, 1H), 3.78 (m, 1H), 2.36 (m, 1H), 1.98 (m, 1H), 1.74 (m, 1H), 1.52 (m, 1H), 1.45 (m, 1H), 0.62 (m, 4H) (ESI,  $m/z$ ):  $[\text{M} + \text{Na}]^+$  calc.: 348.1576, found: 348.1610

***N*-[(1*R*,2*R*,4*S*)-4-(1,4-Dihydronaphthalen-1-ylmethoxy)-2-hydroxycyclopentyl]-3-cyclohexylpropanamide (17c)**

was prepared following the general procedure E using appropriate **resin 2** and 20.0  $\mu\text{mol}$  **7g**. Yield: 90%; purity: 100% (254 nm);  $^1\text{H-NMR}$  (500 MHz,  $[\text{D}_6]\text{-DMSO}$ ) =  $\delta$  (ppm) 8.06 (d, 1H,  $J = 8.0$  Hz), 7.93 (d, 1H,  $J = 7.3$  Hz), 7.87 (d, 1H,  $J = 8.0$  Hz), 7.71 (d, 1H,  $J = 7.1$  Hz), 7.52 (m, 3H), 7.46 (t, 1H,  $J = 7.56$  Hz), 4.85 (m, 3H), 4.12 (m, 1H), 3.92 (m, 1H), 3.75 (m, 1H), 2.35 (m, 1H), 2.03 (m, 2H), 1.96 (m, 1H), 1.75 (m, 1H), 1.62 (m, 5H), 1.45 (m, 1H), 1.34 (m, 2H), 1.12 (m, 4H), 0.82 (m, 2H) (ESI,  $m/z$ ):  $[\text{M} + \text{Na}]^+$  calc.: 418.2358, found: 418.2394

***N*-[(1*R*,2*R*,4*S*)-4-(1,4-Dihydronaphthalen-1-ylmethoxy)-2-hydroxycyclopentyl]-4-phenylbutanamide (17d)**

was prepared following the general procedure E using appropriate **resin 2** and 20.0  $\mu\text{mol}$  **7g**. Yield: 96%; purity: 100% (254 nm);  $^1\text{H-NMR}$  (500 MHz,  $[\text{D}_6]\text{-DMSO}$ ) =  $\delta$  (ppm) 8.07 (m, 1H), 7.94 (m, 1H), 7.86 (d, 1H,  $J = 8.2$  Hz), 7.74 (d, 1H,  $J = 7.3$  Hz), 7.54 (m, 3H), 7.45 (m, 1H), 7.26 (m, 2H), 7.16 (m, 3H), 4.85 (m, 3H), 4.12 (m, 1H), 3.93 (m, 1H), 3.78 (m, 1H), 2.53 (m, 2H), 2.36 (m, 1H), 2.06 (m, 2H), 1.95 (m, 1H), 1.76 (m, 3H), 1.45 (m, 1H) (ESI,  $m/z$ ):  $[\text{M} + \text{Na}]^+$  calc.: 426.2045, found: 426.2065

***N*-[(1*R*,2*R*,4*S*)-4-(1,4-Dihydronaphthalen-1-ylmethoxy)-2-hydroxycyclopentyl]-4-(2,4-dichlorophenoxy)butanamide (17e)**

was prepared following the general procedure E using appropriate **resin 2** and 20.0  $\mu\text{mol}$  **7g**. Yield: 91%; purity: 98% (254 nm);  $^1\text{H-NMR}$  (500 MHz,  $[\text{D}_6]\text{-DMSO}$ ) =  $\delta$  (ppm) 8.06 (d, 1H,  $J = 8.2$  Hz), 7.93 (d, 1H,  $J = 7.8$  Hz), 7.86 (d, 1H,  $J = 8.0$  Hz), 7.84 (d, 1H,  $J = 7.3$  Hz), 7.56-7.50 (m, 4H), 7.46 (m, 1H), 7.34 (m, 1H), 7.15 (d, 1H,  $J = 8.9$  Hz), 4.86-4.83 (m, 3H), 4.11 (m, 1H), 4.04 (t, 2H,  $J = 6.4$  Hz), 3.93 (m, 1H), 3.78 (m, 1H), 2.36 (m, 1H), 2.24 (m, 2H), 1.93 (m, 3H,  $\text{CH}_2/\text{Cyclopentane}$ ), 1.74 (m, 1H), 1.45 (m, 1H) (ESI,  $m/z$ ):  $[\text{M} + \text{H}]^+$  calc.: 488.1395, found: 488.1389

***N*-[(1*R*,2*R*,4*S*)-4-(1,4-Dihydronaphthalen-1-ylmethoxy)-2-hydroxycyclopentyl]-4-phenoxybutanamide (17f)**

was prepared following the general procedure E using appropriate **resin 2** and 20.0  $\mu\text{mol}$  **7g**. Yield: 94%; purity: 100% (254 nm);  $^1\text{H-NMR}$  (500 MHz,  $[\text{D}_6]\text{-DMSO}$ ) =  $\delta$  (ppm) 8.06 (d, 1H,  $J = 8.2$  Hz), 7.94 (d, 1H,  $J = 7.8$  Hz), 7.87 (d, 1H,  $J = 8.0$  Hz), 7.83 (d, 1H,  $J = 7.1$  Hz), 7.54 (m, 3H), 7.46 (m, 1H), 7.25 (m, 2H), 6.90 (m, 3H), 4.85 (m, 3H), 4.11 (m, 1H), 3.93 (m, 3H), 3.78 (m, 1H), 2.36 (m, 1H), 2.22 (t, 2H,  $J = 7.4$  Hz), 1.96 (m, 1H), 1.90 (m, 2H), 1.74 (m, 1H), 1.45 (m, 1H) (ESI,  $m/z$ ):  $[\text{M} + \text{Na}]^+$  calc.: 442.1994, found: 442.1995

***N*-[(1*R*,2*R*,4*S*)-4-(1,4-Dihydronaphthalen-1-ylmethoxy)-2-hydroxycyclopentyl]-2-(1*H*-Indol-3-yl)acetamide (17g)**

was prepared following the general procedure E using appropriate **resin 2** and 20.0  $\mu\text{mol}$  **7g**. Yield: 88%; purity: 95% (254 nm);  $^1\text{H-NMR}$  (500 MHz,  $[\text{D}_6]\text{-DMSO}$ ) =  $\delta$  (ppm) 10.82 (s, 1H), 8.03 (d, 1H,  $J = 8.0$  Hz), 7.93 (m, 1H), 7.86 (m, 2H), 7.49 (m, 5H), 7.33 (d, 1H,  $J = 8.2$  Hz), 7.16 (m, 1H), 7.04 (m, 1H), 6.94 (m, 1H), 4.85 (d, 1H,  $J = 4.3$  Hz), 4.79 (s, 2H), 4.09 (m, 1H), 3.95 (m, 1H), 3.79 (m, 1H), 3.48 (s, 2H), 2.33 (m, 1H), 1.93 (m, 1H), 1.74 (m, 1H), 1.46 (m, 1H) (ESI,  $m/z$ ):  $[\text{M} + \text{Na}]^+$  calc.: 437.1841, found: 437.1824

***N*-[(1*R*,2*R*,4*S*)-4-(1,4-Dihydronaphthalen-1-ylmethoxy)-2-hydroxycyclopentyl]-2-(1*H*-Indol-3-yl)butanamide (17h)**

was prepared following the general procedure E using appropriate **resin 2** and 20.0  $\mu\text{mol}$  **7g**. Yield: 92%; purity: 89% (254 nm);  $^1\text{H-NMR}$  (500 MHz,  $[\text{D}_6]\text{-DMSO}$ ) =  $\delta$  (ppm) 10.72 (s, 1H), 8.07 (d, 1H,  $J = 8.9$  Hz), 7.94 (m, 1H), 7.86 (d, 1H,  $J = 8.0$  Hz), 7.75 (d, 1H,  $J = 7.3$  Hz), 7.52 (m, 3H), 7.46 (m, 2H), 7.31 (d, 1H,  $J = 8.0$  Hz), 7.07 (m, 1H), 7.04 (m, 1H), 6.94 (m, 1H), 4.85 (m, 3H), 4.11 (m, 1H), 3.93 (m, 1H), 3.78 (m, 1H), 2.65 (t, 2H,  $J = 7.4$  Hz), 2.36 (m, 1H), 2.11 (t, 2H,  $J = 7.5$  Hz), 1.96 (m, 1H), 1.84 (m, 2H), 1.76 (m, 1H), 1.46 (m, 1H) (ESI,  $m/z$ ):  $[\text{M} + \text{Na}]^+$  calc.: 465.2154, found: 465.2184

***N*-[(1*R*,2*R*,4*S*)-4-(1,4-Dihydronaphthalen-1-ylmethoxy)-2-hydroxycyclopentyl]-2,2-diphenylacetamide (17i)**

was prepared following the general procedure E using appropriate **resin 2** and 20.0  $\mu\text{mol}$  **7g**. Yield: 89%; purity: 99% (254 nm);  $^1\text{H-NMR}$  (500 MHz,  $[\text{D}_6]\text{-DMSO}$ ) =  $\delta$  (ppm) 8.26 (d, 1H,  $J = 7.1$  Hz), 8.04 (m, 1H), 7.93 (m, 1H), 7.87 (d, 1H,  $J = 8.2$  Hz), 7.53 (m, 2H), 7.46 (m, 2H), 7.27 (m, 8H), 7.21 (m, 2H), 4.93 (s, 1H), 4.86 (m, 1H), 4.83 (s, 2H), 4.12 (m, 1H), 3.96 (m, 1H), 3.81 (m, 1H), 2.38 (m, 1H), 1.94 (m, 1H), 1.75 (m, 1H), 1.45 (m, 1H) (ESI,  $m/z$ ):  $[\text{M} + \text{Na}]^+$  calc.: 474.2045, found: 474.2074

***N*-[(1*R*,2*R*,4*S*)-4-(1,4-Dihydronaphthalen-1-ylmethoxy)-2-hydroxycyclopentyl]-4-(1,1'-biphenyl-4-yl)-4-oxobutanamide (17j)**

was prepared following the general procedure E using appropriate **resin 2** and 20.0  $\mu\text{mol}$  **7g**. Yield: 93%; purity: 98% (254 nm);  $^1\text{H-NMR}$  (500 MHz,  $[\text{D}_6]\text{-DMSO}$ ) =  $\delta$  (ppm) 8.08 (d, 1H,  $J = 8.5$  Hz), 8.05 (m, 2H), 7.93 (m, 1H), 7.90-7.86 (m, 2H), 7.83 (m, 2H), 7.75 (m, 2H), 7.58-7.42 (m, 7H), 4.86 (m, 3H), 4.12 (m, 1H), 3.96 (m, 1H), 3.77 (m, 1H), 3.25 (m, 2H), 2.50 (m, 2H), 2.38 (m, 1H), 1.98 (m, 1H), 1.76 (m, 1H), 1.48 (m, 1H) (ESI,  $m/z$ ):  $[\text{M} + \text{Na}]^+$  calc.: 516.2151, found: 516.2174

***N*-[*(1S,2S,4S)*-4-(1,4-Dihydronaphthalen-1-ylmethoxy)-2-hydroxycyclopentyl]-4-methylpentanamide (18a)**

was prepared following the general procedure E using appropriate **resin 2** and 20.0  $\mu\text{mol}$  **7h**. Yield: 90%; purity: 100% (254 nm);  $^1\text{H-NMR}$  (500 MHz,  $[\text{D}_6]\text{-DMSO}$ ) =  $\delta$  (ppm) 8.09 (d, 1H,  $J = 8.0$  Hz), 7.94 (m, 1H), 7.88 (d, 1H,  $J = 8.2$  Hz), 7.75 (d, 1H,  $J = 7.1$  Hz), 7.54 (m, 3H), 7.47 (m, 1H), 4.86 (m, 3H), 4.04 (m, 1H), 3.91 (m, 1H), 3.78 (m, 1H), 2.30 (m, 1H), 2.05 (m, 3H), 1.63-1.45 (m, 3H), 1.37 (m, 2H), 0.85 (d, 6H,  $J = 6.4$  Hz) (ESI,  $m/z$ ):  $[\text{M} + \text{Na}]^+$  calc.: 378.2045, found: 378.2034

***N*-[*(1S,2S,4S)*-4-(1,4-Dihydronaphthalen-1-ylmethoxy)-2-hydroxycyclopentyl] cyclopropanecarboxamide (18b)**

was prepared following the general procedure E using appropriate **resin 2** and 20.0  $\mu\text{mol}$  **7h**. Yield: 89%; purity: 100% (254 nm);  $^1\text{H-NMR}$  (500 MHz,  $[\text{D}_6]\text{-DMSO}$ ) =  $\delta$  (ppm) 8.09 (d, 1H,  $J = 8.0$  Hz), 8.03 (d, 1H,  $J = 7.1$  Hz), 7.94 (m, 1H), 7.87 (d, 1H,  $J = 8.3$  Hz), 7.54 (m, 3H), 7.47 (m, 1H), 4.89 (d, 1H,  $J = 5.0$  Hz), 4.85 (s, 2H), 4.05 (m, 1H), 3.94 (m, 1H), 3.80 (m, 1H), 2.33 (m, 1H), 2.06 (m, 1H), 1.62 (m, 1H), 1.58-1.50 (m, 2H), 0.63 (m, 4H) (ESI,  $m/z$ ):  $[\text{M} + \text{Na}]^+$  calc.: 348.1576, found: 348.1588

***N*-[*(1S,2S,4S)*-4-(1,4-Dihydronaphthalen-1-ylmethoxy)-2-hydroxycyclopentyl]-3-cyclohexylpropanamide (18c)**

was prepared following the general procedure E using appropriate **resin 2** and 20.0  $\mu\text{mol}$  **7h**. Yield: 89%; purity: 99% (254 nm);  $^1\text{H-NMR}$  (500 MHz,  $[\text{D}_6]\text{-DMSO}$ ) =  $\delta$  (ppm) 8.09 (d, 1H,  $J = 8.5$  Hz), 7.94 (m, 1H), 7.87 (d, 1H,  $J = 8.0$  Hz), 7.72 (d, 1H,  $J = 7.3$  Hz), 7.54 (m, 3H), 7.47 (m, 1H), 4.85 (m, 3H), 4.04 (m, 1H), 3.90 (m, 1H), 3.78 (m, 1H), 2.30 (m, 1H), 2.04 (m, 3H), 1.66 (m, 5H), 1.58 (m, 1H), 1.55 (m, 1H), 1.38 (m, 2H), 1.15 (m, 4H), 0.85 (m, 2H) (ESI,  $m/z$ ):  $[\text{M} + \text{H}]^+$  calc.: 396.2539, found: 396.2519

***N*-[*(1S,2S,4S)*-4-(1,4-Dihydronaphthalen-1-ylmethoxy)-2-hydroxycyclopentyl]-4-phenylbutanamide (18d)**

was prepared following the general procedure E using appropriate **resin 2** and 20.0  $\mu\text{mol}$  **7h**. Yield: 95%; purity: 100% (254 nm);  $^1\text{H-NMR}$  (500 MHz,  $[\text{D}_6]\text{-DMSO}$ ) =  $\delta$  (ppm) 8.09 (d, 1H,  $J = 8.3$  Hz), 7.94 (d, 1H,  $J = 8.0$  Hz), 7.87 (d, 1H,  $J = 8.2$  Hz), 7.75 (d, 1H,  $J = 7.3$  Hz), 7.54 (m, 3H), 7.47 (m, 1H), 7.27 (m, 2H), 7.18 (d, 3H,  $J = 7.6$  Hz), 4.85 (m, 3H), 4.04 (m, 1H), 3.93 (m, 1H), 3.78 (m, 1H), 2.55 (m, 2H), 2.30 (m, 1H), 2.07 (m, 3H), 1.78 (m, 2H), 1.63-1.52 (m, 2H) (ESI,  $m/z$ ):  $[\text{M} + \text{Na}]^+$  calc.: 426.2045, found: 426.2045

***N*-[*(1S,2S,4S)*-4-(1,4-Dihydronaphthalen-1-ylmethoxy)-2-hydroxycyclopentyl]-4-(2,4-dichlorophenoxy)butanamide (18e)**

was prepared following the general procedure E using appropriate **resin 2** and 20.0  $\mu\text{mol}$  **7h**. Yield: 89%; purity: 100% (254 nm);  $^1\text{H-NMR}$  (500 MHz,  $[\text{D}_6]\text{-DMSO}$ ) =  $\delta$  (ppm) 8.09 (d, 1H,  $J = 8.3$  Hz), 7.92 (m, 1H), 7.87 (d, 1H,  $J = 8.3$  Hz), 7.83 (d, 1H,  $J = 7.1$  Hz), 7.58-7.51 (m, 4H), 7.46 (m, 1H), 7.34 (m, 1H), 7.16 (d, 1H,  $J = 8.9$  Hz), 4.86 (d, 1H,  $J = 4.8$  Hz), 4.84 (s, 2H), 4.06 (t, 2H,  $J = 6.4$  Hz), 4.03 (m, 1H), 3.95 (m, 1H), 3.78 (m, 1H), 2.30 (m, 1H), 2.25 (m, 2H), 2.05 (m, 1H), 1.95 (m, 2H), 1.60 (m, 1H), 1.55 (m, 1H) (ESI,  $m/z$ ):  $[\text{M} + \text{Na}]^+$  calc.: 510.1215, found: 510.1235

***N*-[*(1S,2S,4S)*-4-(1,4-Dihydronaphthalen-1-ylmethoxy)-2-hydroxycyclopentyl]-4-phenoxybutanamide (18f)**

was prepared following the general procedure E using appropriate **resin 2** and 20.0  $\mu\text{mol}$  **7h**. Yield: 97%; purity: 100% (254 nm);  $^1\text{H-NMR}$  (500 MHz,  $[\text{D}_6]\text{-DMSO}$ ) =  $\delta$  (ppm) 8.10 (d, 1H,  $J = 8.9$  Hz), 7.93 (m, 1H), 7.87 (d, 1H,  $J = 8.2$  Hz), 7.83 (d, 1H,  $J = 7.3$  Hz), 7.53 (m, 3H), 7.47 (m, 1H), 7.27 (m, 2H), 6.91 (m, 3H), 4.87 (d, 1H), 4.85 (s, 2H), 4.04 (m, 1H), 3.95 (m, 3H), 3.79 (m, 1H), 2.30 (m, 1H), 2.24 (t, 2H,  $J = 7.6$  Hz), 2.05 (m, 1H), 1.92 (m, 2H), 1.64-1.53 (m, 2H) (ESI,  $m/z$ ):  $[\text{M} + \text{H}]^+$  calc.: 420.2175, found: 420.2150

***N*-[*(1S,2S,4S)*-4-(1,4-Dihydronaphthalen-1-ylmethoxy)-2-hydroxycyclopentyl]-2-(1*H*-indol-3-yl)acetamide (18g)**

was prepared following the general procedure E using appropriate **resin 2** and 20.0  $\mu\text{mol}$  **7h**. Yield: 80%; purity: 99% (254 nm);  $^1\text{H-NMR}$  (500 MHz,  $[\text{D}_6]\text{-DMSO}$ ) =  $\delta$  (ppm) 10.81 (s, 1H), 8.07 (d, 1H,  $J = 8.0$  Hz), 7.93 (m, 2H), 7.86 (d, 1H,  $J = 8.0$  Hz), 7.54 (m, 4H), 7.46 (m, 1H), 7.33 (d, 1H,  $J = 8.2$  Hz), 7.17 (m, 1H), 7.05 (m, 1H), 6.96 (m, 1H), 4.87 (d, 1H,  $J = 4.8$  Hz), 4.84 (s, 2H), 4.06 (m, 1H), 3.94 (m, 1H), 3.81 (m, 1H), 3.49 (s, 2H), 2.34-2.28 (m, 1H), 2.06 (m, 1H), 1.64 (m, 1H), 1.56 (m, 1H) (ESI,  $m/z$ ):  $[\text{M} + \text{H}]^+$  calc.: 415.2022, found: 415.2032

***N*-[*(1S,2S,4S)*-4-(1,4-Dihydronaphthalen-1-ylmethoxy)-2-hydroxycyclopentyl]-2-(1*H*-Indol-3-yl)butanamide (18h)**

was prepared following the general procedure E using appropriate **resin 2** and 20.0  $\mu\text{mol}$  **7h**. Yield: 90%; purity: 99% (254 nm);  $^1\text{H-NMR}$  (500 MHz,  $[\text{D}_6]\text{-DMSO}$ ) =  $\delta$  (ppm) 10.72 (s, 1H), 8.08 (d, 1H,  $J = 8.5$  Hz), 7.93 (m, 1H), 7.87 (d, 1H,  $J = 8.3$  Hz), 7.75 (d, 1H,  $J = 7.1$  Hz), 7.52 (m, 3H), 7.46 (m, 2H), 7.32 (d, 1H,  $J = 8.3$  Hz), 7.09 (m, 1H), 7.04 (m, 1H), 6.95 (m, 1H), 4.86 (d, 1H,  $J = 4.6$  Hz), 4.85 (s, 2H), 4.04 (m, 1H), 3.94 (m, 1H), 3.79 (m, 1H), 2.66 (t, 2H,  $J = 7.4$  Hz), 2.30 (m, 1H), 2.13 (t, 2H,  $J = 7.4$  Hz), 2.05 (m, 1H), 1.86 (m, 2H), 1.64-1.53 (m, 2H) (ESI,  $m/z$ ):  $[\text{M} + \text{H}]^+$  calc.: 443.2335, found: 443.2357

***N*-[*(1S,2S,4S)*-4-(1,4-Dihydronaphthalen-1-ylmethoxy)-2-hydroxycyclopentyl]-2,2-diphenylacetamide (18i)**

was prepared following the general procedure E using appropriate **resin 2** and 20.0  $\mu\text{mol}$  **7h**. Yield: 93%; purity: 100% (254 nm);  $^1\text{H-NMR}$  (500 MHz,  $[\text{D}_6]\text{-DMSO}$ ) =  $\delta$  (ppm) 8.29 (d, 1H,  $J = 7.1$  Hz), 8.07 (m, 1H), 7.93 (m, 1H), 7.86 (d, 1H,  $J = 8.3$  Hz), 7.57-7.50 (m, 3H), 7.46 (m, 1H), 7.29 (m, 8H), 7.21 (m, 2H), 4.92 (s, 1H), 4.86 (m, 1H), 4.84 (m, 2H), 4.04 (m, 1H), 3.95 (m, 1H), 3.82 (m, 1H), 2.30 (m, 1H), 2.09 (m, 1H), 1.64-1.53 (m, 2H) (ESI,  $m/z$ ):  $[\text{M} + \text{Na}]^+$  calc.: 474.2045, found: 474.2051

***N*-[*(1S,2S,4S)*-4-(1,4-Dihydronaphthalen-1-ylmethoxy)-2-hydroxycyclopentyl]-4-(1,1'-biphenyl-4-yl)-4-oxobutanamide (18j)**

was prepared following the general procedure E using appropriate **resin 2** and 20.0  $\mu\text{mol}$  **7h**. Yield: 94%; purity: 86% (254 nm);  $^1\text{H-NMR}$  (500 MHz,  $[\text{D}_6]\text{-DMSO}$ ) =  $\delta$  (ppm) 8.09 (d, 1H,  $J = 7.3$  Hz), 8.06 (m, 2H), 7.94 (m, 1H), 7.90-7.86 (m, 2H), 7.84 (m, 2H), 7.75 (m, 2H), 7.57-7.46 (m, 6H), 7.43 (m, 1H), 4.86 (m, 3H), 4.07 (m, 1H), 3.93 (m, 1H), 3.81 (m, 1H), 3.26 (m, 2H), 2.50 (m, 2H), 2.33 (m, 1H), 2.07 (m, 1H), 1.65 (m, 1H), 1.56 (m, 1H) (ESI,  $m/z$ ):  $[\text{M} + \text{H}]^+$  calc.: 494.2331, found: 494.2337.
